# Supplementary material
Source: publisher figshare collection journal article supplement (https://f1000.figshare.com/articles/dataset/_/726135)
Supplement: Supplementary file 1 [file 1]

### **Fig 3a H1 – 0 is different to 100 and 200 but not 12.5 or 50**

#### **One Way Analysis of Variance**

**Normality Test (Shapiro-Wilk)** Failed (P < 0.050)

Test execution ended by user request, ANOVA on Ranks begun

#### **Kruskal-Wallis One Way Analysis of Variance on Ranks**

| <b>Group</b> | <b>N</b> | <b>Missing</b> | <b>Median</b> | <b>25%</b> | <b>75%</b> |
|--------------|----------|----------------|---------------|------------|------------|
| 0.0000       | 32       | 0              | 13557.167     | 12363.875  | 15557.688  |
| 12.5000      | 20       | 0              | 13895.708     | 13172.604  | 15354.021  |
| 25.0000      | 20       | 0              | 13938.000     | 12270.500  | 16473.750  |
| 50.0000      | 38       | 0              | 16685.667     | 15590.958  | 22527.859  |
| 100.0000     | 53       | 0              | 54308.000     | 48973.917  | 58689.906  |
| 200.0000     | 43       | 0              | 111201.000    | 102242.500 | 117362.667 |

H = 175.943 with 5 degrees of freedom. (P = <0.001)

The differences in the median values among the treatment groups are greater than would be expected by chance; there is a statistically significant difference (P = <0.001)

To isolate the group or groups that differ from the others use a multiple comparison procedure.

Multiple Comparisons versus Control Group (Dunn's Method) :

| <b>Comparison</b>  | <b>Diff of Ranks</b> | <b>Q</b> | <b>P&lt;0.05</b> |
|--------------------|----------------------|----------|------------------|
| 200.0000 vs 0.0000 | 144.250              | 10.365   | Yes              |
| 100.0000 vs 0.0000 | 96.250               | 7.212    | Yes              |
| 50.0000 vs 0.0000  | 35.803               | 2.503    | No               |
| 12.5000 vs 0.0000  | 8.700                | 0.512    | Do Not Test      |
| 25.0000 vs 0.0000  | 4.400                | 0.259    | Do Not Test      |

Note: The multiple comparisons on ranks do not include an adjustment for ties.

### **Fig 3 b-e H2A – no difference**

#### **One Way Analysis of Variance**

**Normality Test (Shapiro-Wilk)** Passed (P = 0.895)

**Equal Variance Test:** Passed (P = 0.617)

| <b>Group Name</b> | <b>N</b> | <b>Missing</b> | <b>Mean</b> | <b>Std Dev</b> | <b>SEM</b> |
|-------------------|----------|----------------|-------------|----------------|------------|
| 0.0000            | 32       | 0              | 13880.500   | 1892.466       | 334.544    |
| 12.5000           | 8        | 0              | 14992.625   | 1484.117       | 524.715    |
| 25.0000           | 8        | 0              | 14798.500   | 1404.250       | 496.477    |
| 50.0000           | 8        | 0              | 14092.875   | 1358.809       | 480.412    |
| 100.0000          | 8        | 0              | 14192.625   | 1586.644       | 560.964    |
| 200.0000          | 8        | 0              | 15695.500   | 2054.119       | 726.241    |

| <b>Source of Variation</b> | <b>DF</b> | <b>SS</b>     | <b>MS</b>   | <b>F</b> | <b>P</b> |
|----------------------------|-----------|---------------|-------------|----------|----------|
| Between Groups             | 5         | 27158260.361  | 5431652.072 | 1.790    | 0.127    |
| Residual                   | 66        | 200328391.458 | 3035278.658 |          |          |
| Total                      | 71        | 227486651.819 |             |          |          |

The differences in the mean values among the treatment groups are not great enough to exclude the possibility that the difference is due to random sampling variability; there is not a statistically significant difference (P = 0.127).

Power of performed test with alpha = 0.050: 0.261

The power of the performed test (0.261) is below the desired power of 0.800.

Less than desired power indicates you are less likely to detect a difference when one actually exists. Negative results should be interpreted cautiously.

## **H2B – failed normality test therefore anova on ranks 0 versus 200 is different**

### **One Way Analysis of Variance**

**Normality Test (Shapiro-Wilk)** Passed (P = 0.203)

**Equal Variance Test:** Failed (P < 0.050)

Test execution ended by user request, ANOVA on Ranks begun

### **Kruskal-Wallis One Way Analysis of Variance on Ranks**

| <b>Group</b> | <b>N</b> | <b>Missing</b> | <b>Median</b> | <b>25%</b> | <b>75%</b> |
|--------------|----------|----------------|---------------|------------|------------|
| 0.0000       | 32       | 0              | 13557.167     | 12363.875  | 15557.688  |
| 12.5000      | 8        | 0              | 15215.000     | 13670.750  | 15771.750  |
| 25.0000      | 8        | 0              | 15285.000     | 14144.750  | 15902.250  |
| 50.0000      | 8        | 0              | 14903.500     | 14220.000  | 15346.500  |
| 100.0000     | 8        | 0              | 15484.000     | 14241.250  | 15989.750  |
| 200.0000     | 8        | 0              | 16691.500     | 15159.500  | 17015.250  |

H = 16.407 with 5 degrees of freedom. (P = 0.006)

The differences in the median values among the treatment groups are greater than would be expected by chance; there is a statistically significant difference (P = 0.006)

To isolate the group or groups that differ from the others use a multiple comparison procedure.

Multiple Comparisons versus Control Group (Dunn's Method) :

| <b>Comparison</b>         | <b>Diff of Ranks</b> | <b>Q</b>     | <b>P&lt;0.05</b> |
|---------------------------|----------------------|--------------|------------------|
| <b>200.0000 vs 0.0000</b> | <b>30.188</b>        | <b>3.649</b> | <b>Yes</b>       |
| 25.0000 vs 0.0000         | 17.188               | 2.078        | No               |
| 100.0000 vs 0.0000        | 15.938               | 1.927        | Do Not Test      |
| 12.5000 vs 0.0000         | 12.313               | 1.488        | Do Not Test      |
| 50.0000 vs 0.0000         | 10.438               | 1.262        | Do Not Test      |

Note: The multiple comparisons on ranks do not include an adjustment for ties.

### **H3 – anova no difference**

#### **One Way Analysis of Variance**

**Normality Test (Shapiro-Wilk)** Passed (P = 0.553)

**Equal Variance Test:** Passed (P = 0.709)

| <b>Group Name</b> | <b>N</b> | <b>Missing</b> | <b>Mean</b> | <b>Std Dev</b> | <b>SEM</b> |
|-------------------|----------|----------------|-------------|----------------|------------|
| 0.0000            | 32       | 0              | 13880.500   | 1892.466       | 334.544    |
| 12.5000           | 8        | 0              | 14043.500   | 1733.379       | 612.842    |
| 25.0000           | 8        | 0              | 13876.875   | 1595.801       | 564.201    |
| 50.0000           | 8        | 0              | 14126.875   | 2744.915       | 970.474    |
| 100.0000          | 8        | 0              | 15030.125   | 1603.870       | 567.054    |
| 200.0000          | 8        | 0              | 15403.500   | 2037.439       | 720.344    |

| <b>Source of Variation</b> | <b>DF</b> | <b>SS</b>     | <b>MS</b>   | <b>F</b> | <b>P</b> |
|----------------------------|-----------|---------------|-------------|----------|----------|
| Between Groups             | 5         | 21404135.250  | 4280827.050 | 1.132    | 0.353    |
| Residual                   | 66        | 249689381.458 | 3783172.446 |          |          |
| Total                      | 71        | 271093516.708 |             |          |          |

The differences in the mean values among the treatment groups are not great enough to exclude the possibility that the difference is due to random sampling variability; there is not a statistically significant difference (P = 0.353).

Power of performed test with alpha = 0.050: 0.077

The power of the performed test (0.077) is below the desired power of 0.800.

Less than desired power indicates you are less likely to detect a difference when one actually exists. Negative results should be interpreted cautiously.

## **H4 – one way anova 0 vs 100 and 0 vs 200 are different**

### **One Way Analysis of Variance**

**Normality Test (Shapiro-Wilk)** Passed (P = 0.946)

**Equal Variance Test:** Passed (P = 0.568)

| Group Name | N  | Missing | Mean      | Std Dev  | SEM     |
|------------|----|---------|-----------|----------|---------|
| 0.0000     | 32 | 0       | 13880.500 | 1892.466 | 334.544 |
| 12.5000    | 12 | 0       | 14154.583 | 1989.297 | 574.261 |
| 25.0000    | 12 | 0       | 13980.667 | 1449.016 | 418.295 |
| 50.0000    | 12 | 0       | 14571.833 | 1416.573 | 408.929 |
| 100.0000   | 12 | 0       | 15630.250 | 1585.701 | 457.752 |
| 200.0000   | 12 | 0       | 15524.667 | 1294.163 | 373.593 |

| Source of Variation | DF | SS            | MS          | F     | P     |
|---------------------|----|---------------|-------------|-------|-------|
| Between Groups      | 5  | 44808373.051  | 8961674.610 | 3.135 | 0.012 |
| Residual            | 86 | 245806561.000 | 2858215.826 |       |       |
| Total               | 91 | 290614934.051 |             |       |       |

The differences in the mean values among the treatment groups are greater than would be expected by chance; there is a statistically significant difference (P = 0.012).

Power of performed test with alpha = 0.050: 0.677

Multiple Comparisons versus Control Group (Holm-Sidak method):  
Overall significance level = 0.05

Comparisons for factor:

| Comparison                 | Diff of Means   | t            | P            | P<0.050    |
|----------------------------|-----------------|--------------|--------------|------------|
| <b>0.0000 vs. 100.0000</b> | <b>1749.750</b> | <b>3.058</b> | <b>0.015</b> | <b>Yes</b> |
| <b>0.0000 vs. 200.0000</b> | <b>1644.167</b> | <b>2.873</b> | <b>0.020</b> | <b>Yes</b> |
| 0.0000 vs. 50.0000         | 691.333         | 1.208        | 0.544        | No         |
| 0.0000 vs. 12.5000         | 274.083         | 0.479        | 0.865        | No         |
| 0.0000 vs. 25.0000         | 100.167         | 0.175        | 0.861        | No         |

**100 and 200 nM concentrations appear to show an effect for histone H4, however, comparing these concentrations to the other histones found the values to be similar (see below). Furthermore, H1 shows a greater difference at these concentrations than H4 (see below).**

## Histone intergroup testing at 200 nM

### One Way Analysis of Variance

**Normality Test (Shapiro-Wilk)** Passed (P = 0.659)

**Equal Variance Test:** Passed (P = 0.535)

| Group Name | N  | Missing | Mean      | Std Dev  | SEM     |
|------------|----|---------|-----------|----------|---------|
| H2A        | 8  | 0       | 15695.500 | 2054.119 | 726.241 |
| H2B        | 8  | 0       | 16302.875 | 1096.463 | 387.658 |
| H3         | 8  | 0       | 15403.500 | 2037.439 | 720.344 |
| H4         | 12 | 0       | 15524.667 | 1294.163 | 373.593 |

| Source of Variation | DF | SS           | MS          | F     | P     |
|---------------------|----|--------------|-------------|-------|-------|
| Between Groups      | 3  | 3977340.764  | 1325780.255 | 0.497 | 0.687 |
| Residual            | 32 | 85432999.542 | 2669781.236 |       |       |
| Total               | 35 | 89410340.306 |             |       |       |

The differences in the mean values among the treatment groups are not great enough to exclude the possibility that the difference is due to random sampling variability; there is not a statistically significant difference (P = 0.687).

Power of performed test with alpha = 0.050: 0.049

The power of the performed test (0.049) is below the desired power of 0.800.

Less than desired power indicates you are less likely to detect a difference when one actually exists. Negative results should be interpreted cautiously.

## H1 versus others at 200 nM

### One Way Analysis of Variance

**Normality Test (Shapiro-Wilk)** Failed (P < 0.050)

Test execution ended by user request, ANOVA on Ranks begun

### Kruskal-Wallis One Way Analysis of Variance on Ranks

| Group | N  | Missing | Median     | 25%        | 75%        |
|-------|----|---------|------------|------------|------------|
| H1    | 43 | 0       | 111201.000 | 102242.500 | 117362.667 |
| H2A   | 8  | 0       | 16622.000  | 13709.750  | 17181.750  |
| H2B   | 8  | 0       | 16691.500  | 15159.500  | 17015.250  |
| H3    | 8  | 0       | 15712.500  | 13685.000  | 17023.750  |
| H4    | 12 | 0       | 15406.500  | 14370.500  | 16332.000  |

H = 58.370 with 4 degrees of freedom. (P = <0.001)

The differences in the median values among the treatment groups are greater than would be expected by chance; there is a statistically significant difference (P = <0.001)

To isolate the group or groups that differ from the others use a multiple comparison procedure.

Multiple Comparisons versus Control Group (Dunn's Method) :

| Comparison | Diff of Ranks | Q     | P<0.05 |
|------------|---------------|-------|--------|
| H4 vs H1   | 41.583        | 5.550 | Yes    |
| H3 vs H1   | 40.875        | 4.626 | Yes    |
| H2A vs H1  | 38.375        | 4.343 | Yes    |
| H2B vs H1  | 36.125        | 4.088 | Yes    |

Note: The multiple comparisons on ranks do not include an adjustment for ties.

### Histone intergroup testing at 100 nM

#### One Way Analysis of Variance

Normality Test (Shapiro-Wilk) Passed (P = 0.425)

Equal Variance Test: Passed (P = 0.671)

| Group Name | N  | Missing | Mean      | Std Dev  | SEM     |
|------------|----|---------|-----------|----------|---------|
| H2A        | 8  | 0       | 14192.625 | 1586.644 | 560.964 |
| H2B        | 8  | 0       | 15145.250 | 987.573  | 349.160 |
| H3         | 8  | 0       | 15030.125 | 1603.870 | 567.054 |
| H4         | 12 | 0       | 15630.250 | 1585.701 | 457.752 |

| Source of Variation | DF | SS           | MS          | F     | P     |
|---------------------|----|--------------|-------------|-------|-------|
| Between Groups      | 3  | 9982871.806  | 3327623.935 | 1.519 | 0.228 |
| Residual            | 32 | 70114916.500 | 2191091.141 |       |       |
| Total               | 35 | 80097788.306 |             |       |       |

The differences in the mean values among the treatment groups are not great enough to exclude the possibility that the difference is due to random sampling variability; there is not a statistically significant difference (P = 0.228).

Power of performed test with alpha = 0.050: 0.140

The power of the performed test (0.140) is below the desired power of 0.800.

Less than desired power indicates you are less likely to detect a difference when one actually exists. Negative results should be interpreted cautiously.

## Histone H1 versus other groups at 100 nM

### One Way Analysis of Variance

Normality Test (Shapiro-Wilk) Failed ( $P < 0.050$ )

Test execution ended by user request, ANOVA on Ranks begun

### Kruskal-Wallis One Way Analysis of Variance on Ranks

| Group | N  | Missing | Median    | 25%       | 75%       |
|-------|----|---------|-----------|-----------|-----------|
| H1    | 53 | 0       | 54308.000 | 48973.917 | 58689.906 |
| H2A   | 8  | 0       | 14409.500 | 13344.250 | 15602.000 |
| H2B   | 8  | 0       | 15484.000 | 14241.250 | 15989.750 |
| H3    | 8  | 0       | 15145.500 | 13703.000 | 16323.250 |
| H4    | 12 | 0       | 16067.000 | 14232.500 | 16611.750 |

H = 64.296 with 4 degrees of freedom. ( $P = <0.001$ )

The differences in the median values among the treatment groups are greater than would be expected by chance; there is a statistically significant difference ( $P = <0.001$ )

To isolate the group or groups that differ from the others use a multiple comparison procedure.

Multiple Comparisons versus Control Group (Dunn's Method) :

| Comparison | Diff of Ranks | Q     | P<0.05 |
|------------|---------------|-------|--------|
| H2A vs H1  | 50.500        | 5.153 | Yes    |
| H2B vs H1  | 44.375        | 4.528 | Yes    |
| H3 vs H1   | 44.375        | 4.528 | Yes    |
| H4 vs H1   | 40.667        | 4.924 | Yes    |

Note: The multiple comparisons on ranks do not include an adjustment for ties.



## Fig 5 Caspase

After 6 hour treatment 100 and 200 but not 50 are different to control

### One Way Analysis of Variance

Data source: Caspase 6 vs 24

Normality Test (Shapiro-Wilk) Passed (P = 0.839)

Equal Variance Test: Passed (P = 0.260)

| Group Name  | N  | Missing | Mean   | Std Dev | SEM   |
|-------------|----|---------|--------|---------|-------|
| CON 6       | 10 | 0       | 6.322  | 5.840   | 1.847 |
| H1 50 at 6  | 10 | 0       | 9.323  | 3.138   | 0.992 |
| H1 100 at 6 | 14 | 0       | 13.803 | 6.457   | 1.726 |
| H1 200 at 6 | 10 | 0       | 14.724 | 7.594   | 2.401 |

| Source of Variation | DF | SS       | MS      | F     | P     |
|---------------------|----|----------|---------|-------|-------|
| Between Groups      | 3  | 491.790  | 163.930 | 4.502 | 0.008 |
| Residual            | 40 | 1456.610 | 36.415  |       |       |
| Total               | 43 | 1948.400 |         |       |       |

The differences in the mean values among the treatment groups are greater than would be expected by chance; there is a statistically significant difference (P = 0.008).

Power of performed test with alpha = 0.050: 0.741

Multiple Comparisons versus Control Group (Holm-Sidak method):  
Overall significance level = 0.05

Comparisons for factor:

| Comparison            | Diff of Means | t     | P     | P<0.050 |
|-----------------------|---------------|-------|-------|---------|
| CON 6 vs. H1 200 at 6 | 8.401         | 3.113 | 0.010 | Yes     |
| CON 6 vs. H1 100 at 6 | 7.481         | 2.994 | 0.009 | Yes     |
| CON 6 vs. H1 50 at 6  | 3.000         | 1.112 | 0.273 | No      |

**After 24 hour treatment 100 and 200 but not 50 are different to control**

### **One Way Analysis of Variance**

**Data source:** Capsase 6 vs 24

**Normality Test (Shapiro-Wilk)** Failed (P < 0.050)

Test execution ended by user request, ANOVA on Ranks begun

### **Kruskal-Wallis One Way Analysis of Variance on Ranks**

**Data source:** Capsase 6 vs 24

| <b>Group</b> | <b>N</b> | <b>Missing</b> | <b>Median</b> | <b>25%</b> | <b>75%</b> |
|--------------|----------|----------------|---------------|------------|------------|
| CON 24       | 9        | 0              | 8.511         | 5.461      | 19.989     |
| H1 50 at 24  | 10       | 0              | 11.555        | 3.655      | 21.344     |
| H1 100 at 24 | 10       | 0              | 21.325        | 12.872     | 38.630     |
| H1 200 at 24 | 12       | 0              | 21.548        | 20.849     | 34.534     |

H = 13.599 with 3 degrees of freedom. (P = 0.004)

The differences in the median values among the treatment groups are greater than would be expected by chance; there is a statistically significant difference (P = 0.004)

To isolate the group or groups that differ from the others use a multiple comparison procedure.

Multiple Comparisons versus Control Group (Dunn's Method):

| <b>Comparison</b>      | <b>Diff of Ranks</b> | <b>Q</b> | <b>P&lt;0.05</b> |
|------------------------|----------------------|----------|------------------|
| H1 200 at 24 vs CON 24 | 15.806               | 2.992    | Yes              |
| H1 100 at 24 vs CON 24 | 13.022               | 2.366    | No               |
| H1 50 at 24 vs CON 24  | 1.722                | 0.313    | Do Not Test      |

Note: The multiple comparisons on ranks do not include an adjustment for ties.

Individual t-test on the data confirm that 50 is not different to control after either 6 or 24 hours

### **t-test**

**Data source:** Capsase 6 vs 24

**Normality Test (Shapiro-Wilk)** Failed (P < 0.050)

Test execution ended by user request, Rank Sum Test begun

### **Mann-Whitney Rank Sum Test**

**Data source:** Capsase 6 vs 24

| <b>Group</b> | <b>N</b> | <b>Missing</b> | <b>Median</b> | <b>25%</b> | <b>75%</b> |
|--------------|----------|----------------|---------------|------------|------------|
| CON 6        | 10       | 0              | 3.956         | 2.197      | 10.789     |
| H1 50 at 6   | 10       | 0              | 8.791         | 6.312      | 13.201     |

Mann-Whitney U Statistic= 25.000

T = 80.000 n(small)= 10 n(big)= 10 (P = 0.064)

The difference in the median values between the two groups is not great enough to exclude the possibility that the difference is due to random sampling variability; there is not a statistically significant difference (P = 0.064)

#### **t-test**

**Data source:** Capsase 6 vs 24

**Normality Test (Shapiro-Wilk)** Passed (P = 0.107)

**Equal Variance Test:** Passed (P = 0.875)

| <b>Group Name</b> | <b>N</b> | <b>Missing</b> | <b>Mean</b> | <b>Std Dev</b> | <b>SEM</b> |
|-------------------|----------|----------------|-------------|----------------|------------|
| CON 24            | 9        | 0              | 11.889      | 8.624          | 2.875      |
| H1 50 at 24       | 10       | 0              | 12.627      | 8.051          | 2.546      |

Difference -0.737  
t = -0.193 with 17 degrees of freedom.

95 percent two-tailed confidence interval for difference of means: -8.808 to 7.334

Two-tailed P-value = 0.849

The difference in the mean values of the two groups is not great enough to reject the possibility that the difference is due to random sampling variability. There is not a statistically significant difference between the input groups (P = 0.849).

One-tailed P-value = 0.425

The sample mean of group H1 50 at 24 does not exceed the sample mean of the group CON 24 by an amount great enough to exclude the possibility that the difference is due to random sampling variability. The hypothesis that the population mean of group CON 24 is greater than or equal to the population mean of group H1 50 at 24 cannot be rejected. (P = 0.425).

Power of performed two-tailed test with alpha = 0.050: 0.054

The power of the performed test (0.054) is below the desired power of 0.800. Less than desired power indicates you are less likely to detect a difference when one actually exists. Negative results should be interpreted cautiously.

## Fig 6 Substrates

### PDL – 5 and 10 but not 2.5 is different to 1.25

#### One Way Analysis of Variance

Data source: HV111S

Normality Test (Shapiro-Wilk) Failed (P < 0.050)

Test execution ended by user request, ANOVA on Ranks begun

#### Kruskal-Wallis One Way Analysis of Variance on Ranks

Data source: HV111S

| Group   | N  | Missing | Median      | 25%         | 75%         |
|---------|----|---------|-------------|-------------|-------------|
| 1.2500  | 12 | 0       | 5385972.000 | 4935017.000 | 5791067.500 |
| 2.5000  | 12 | 0       | 5789869.500 | 5599905.000 | 6157711.750 |
| 5.0000  | 12 | 0       | 6179598.000 | 6083917.250 | 6381019.250 |
| 10.0000 | 12 | 0       | 7329992.000 | 7172166.250 | 7418167.000 |

H = 34.679 with 3 degrees of freedom. (P = <0.001)

The differences in the median values among the treatment groups are greater than would be expected by chance; there is a statistically significant difference (P = <0.001)

To isolate the group or groups that differ from the others use a multiple comparison procedure.

Multiple Comparisons versus Control Group (Dunn's Method):

| Comparison        | Diff of Ranks | Q     | P<0.05 |
|-------------------|---------------|-------|--------|
| 10.0000 vs 1.2500 | 31.750        | 5.555 | Yes    |
| 5.0000 vs 1.2500  | 16.333        | 2.858 | Yes    |
| 2.5000 vs 1.2500  | 6.917         | 1.210 | No     |

Note: The multiple comparisons on ranks do not include an adjustment for ties.

### PDL – or run the means and all are different to 1.25.

#### One Way Analysis of Variance

Data source: PDL

Normality Test (Shapiro-Wilk) Failed (P < 0.050)

Equal Variance Test: Failed (P < 0.050)

| Group Name | N  | Missing | Mean        | Std Dev    | SEM        |
|------------|----|---------|-------------|------------|------------|
| 1.2500     | 12 | 0       | 5366390.417 | 608827.919 | 175753.482 |
| 2.5000     | 12 | 0       | 5799679.583 | 469190.202 | 135443.545 |
| 5.0000     | 12 | 0       | 6205013.417 | 167204.644 | 48267.823  |
| 10.0000    | 12 | 0       | 7297945.833 | 196843.677 | 56823.875  |

| Source of Variation | DF | SS         | MS               | F      | P      |
|---------------------|----|------------|------------------|--------|--------|
| Between Groups      | 3  | 2.468E+013 | 8.226E+012       | 50.040 | <0.001 |
| Residual            | 44 | 7.233E+012 | 164378926934.464 |        |        |

Total 47 3.191E+013

The differences in the mean values among the treatment groups are greater than would be expected by chance; there is a statistically significant difference ( $P = <0.001$ ).

Power of performed test with  $\alpha = 0.050$ : 1.000

Multiple Comparisons versus Control Group (Holm-Sidak method):  
Overall significance level = 0.05

Comparisons for factor:

| Comparison         | Diff of Means | t      | P      | P<0.050 |
|--------------------|---------------|--------|--------|---------|
| 1.2500 vs. 10.0000 | 1931555.417   | 11.670 | <0.001 | Yes     |
| 1.2500 vs. 5.0000  | 838623.000    | 5.067  | <0.001 | Yes     |
| 1.2500 vs. 2.5000  | 433289.167    | 2.618  | 0.012  | Yes     |

## H1 all are different to 1.25

### One Way Analysis of Variance

Data source: H1

Normality Test (Shapiro-Wilk) Passed ( $P = 0.901$ )

Equal Variance Test: Passed ( $P = 0.586$ )

| Group Name | N  | Missing | Mean        | Std Dev    | SEM       |
|------------|----|---------|-------------|------------|-----------|
| 1.2500     | 12 | 0       | 5209347.917 | 258936.421 | 74748.506 |
| 2.5000     | 12 | 0       | 6045009.583 | 205111.454 | 59210.577 |
| 5.0000     | 12 | 0       | 7084854.333 | 323293.841 | 93326.893 |
| 10.0000    | 12 | 0       | 7527943.750 | 302330.631 | 87275.336 |

| Source of Variation | DF | SS         | MS              | F       | P      |
|---------------------|----|------------|-----------------|---------|--------|
| Between Groups      | 3  | 3.921E+013 | 1.307E+013      | 171.366 | <0.001 |
| Residual            | 44 | 3.355E+012 | 76260374224.517 |         |        |
| Total               | 47 | 4.256E+013 |                 |         |        |

The differences in the mean values among the treatment groups are greater than would be expected by chance; there is a statistically significant difference ( $P = <0.001$ ).

Power of performed test with  $\alpha = 0.050$ : 1.000

Multiple Comparisons versus Control Group (Holm-Sidak method):  
Overall significance level = 0.05

Comparisons for factor:

| Comparison         | Diff of Means | t      | P      | P<0.050 |
|--------------------|---------------|--------|--------|---------|
| 1.2500 vs. 10.0000 | 2318595.833   | 20.566 | <0.001 | Yes     |
| 1.2500 vs. 5.0000  | 1875506.417   | 16.636 | <0.001 | Yes     |
| 1.2500 vs. 2.5000  | 835661.667    | 7.412  | <0.001 | Yes     |

## H1 and H1A all different with means

### One Way Analysis of Variance

Data source: H1 H11A

Normality Test (Shapiro-Wilk) Failed ( $P < 0.050$ )

Equal Variance Test: Passed ( $P = 0.562$ )

| Group Name | N  | Missing | Mean        | Std Dev    | SEM        |
|------------|----|---------|-------------|------------|------------|
| 1.2500     | 12 | 0       | 6206270.000 | 505972.812 | 146061.770 |
| 2.5000     | 12 | 0       | 6698473.417 | 625713.081 | 180627.808 |
| 5.0000     | 12 | 0       | 7131414.917 | 303490.879 | 87610.270  |
| 10.0000    | 12 | 0       | 7190751.333 | 264889.008 | 76466.870  |

| Source of Variation | DF | SS         | MS               | F      | P      |
|---------------------|----|------------|------------------|--------|--------|
| Between Groups      | 3  | 7.502E+012 | 2.501E+012       | 12.352 | <0.001 |
| Residual            | 44 | 8.908E+012 | 202449561694.057 |        |        |
| Total               | 47 | 1.641E+013 |                  |        |        |

The differences in the mean values among the treatment groups are greater than would be expected by chance; there is a statistically significant difference ( $P = <0.001$ ).

Power of performed test with  $\alpha = 0.050$ : 0.999

Multiple Comparisons versus Control Group (Holm-Sidak method):  
Overall significance level = 0.05

Comparisons for factor:

| Comparison         | Diff of Means | t     | P      | P<0.050 |
|--------------------|---------------|-------|--------|---------|
| 1.2500 vs. 10.0000 | 984481.333    | 5.360 | <0.001 | Yes     |
| 1.2500 vs. 5.0000  | 925144.917    | 5.036 | <0.001 | Yes     |
| 1.2500 vs. 2.5000  | 492203.417    | 2.680 | 0.010  | Yes     |

## H1 and H11A – all but the 2.5 group different with medians

### One Way Anance

Data source: H1 H11A

Normality Test (Shapiro-Wilk) Failed ( $P < 0.050$ )

Test execution ended by user request, ANOVA on Ranks begun

### Kruskal-Wallis One Way Analysis of Variance on Ranks

Data source: H1 H11A

| Group   | N  | Missing | Median      | 25%         | 75%         |
|---------|----|---------|-------------|-------------|-------------|
| 1.2500  | 12 | 0       | 6257470.500 | 5734357.500 | 6686506.000 |
| 2.5000  | 12 | 0       | 6886542.000 | 6702693.750 | 7003098.750 |
| 5.0000  | 12 | 0       | 7163226.500 | 6970030.000 | 7326806.500 |
| 10.0000 | 12 | 0       | 7268587.500 | 6969436.750 | 7434899.750 |

H = 26.623 with 3 degrees of freedom. ( $P = <0.001$ )

The differences in the median values among the treatment groups are greater than would be expected by chance; there is a statistically significant difference ( $P = <0.001$ )

To isolate the group or groups that differ from the others use a multiple comparison procedure.

Multiple Comparisons versus Control Group (Dunn's Method) :

| Comparison        | Diff of Ranks | Q     | P<0.05 |
|-------------------|---------------|-------|--------|
| 10.0000 vs 1.2500 | 25.583        | 4.476 | Yes    |
| 5.0000 vs 1.2500  | 24.167        | 4.228 | Yes    |
| 2.5000 vs 1.2500  | 11.250        | 1.968 | No     |

Note: The multiple comparisons on ranks do not include an adjustment for ties.

## HV111S only 2.5 is different – but not convincing seems odd quirk of stretch 1.25 group

### One Way Analysis of Variance

Data source: HV111S

Normality Test (Shapiro-Wilk) Passed ( $P = 0.631$ )

Equal Variance Test: Passed ( $P = 0.241$ )

| Group Name | N  | Missing | Mean        | Std Dev    | SEM        |
|------------|----|---------|-------------|------------|------------|
| 1.2500     | 12 | 1       | 6248762.182 | 478377.569 | 144236.264 |
| 2.5000     | 12 | 0       | 6696113.167 | 266833.643 | 77028.238  |
| 5.0000     | 12 | 0       | 6624321.583 | 423301.392 | 122196.586 |
| 10.0000    | 12 | 0       | 6269714.167 | 395012.240 | 114030.211 |

  

| Source of Variation | DF | SS         | MS               | F     | P     |
|---------------------|----|------------|------------------|-------|-------|
| Between Groups      | 3  | 1.918E+012 | 639172169387.812 | 4.066 | 0.013 |
| Residual            | 43 | 6.759E+012 | 157187423948.928 |       |       |
| Total               | 46 | 8.677E+012 |                  |       |       |

The differences in the mean values among the treatment groups are greater than would be expected by chance; there is a statistically significant difference ( $P = 0.013$ ).

Power of performed test with  $\alpha = 0.050$ : 0.677

Multiple Comparisons versus Control Group (Holm-Sidak method):  
Overall significance level = 0.05

Comparisons for factor:

| Comparison         | Diff of Means | t     | P     | P<0.050 |
|--------------------|---------------|-------|-------|---------|
| 1.2500 vs. 2.5000  | 447350.985    | 2.703 | 0.029 | Yes     |
| 1.2500 vs. 5.0000  | 375559.402    | 2.269 | 0.056 | No      |
| 1.2500 vs. 10.0000 | 20951.985     | 0.127 | 0.900 | No      |

Figure 8b Ox-6 stats

**One Way Analysis of Variance**

| Group Name | N | Missing | Mean   | Std Dev | SEM   |
|------------|---|---------|--------|---------|-------|
| Row 1      | 8 | 0       | 9.342  | 5.364   | 1.896 |
| Row 2      | 9 | 0       | 58.332 | 6.341   | 2.114 |
| Row 3      | 9 | 0       | 69.797 | 18.884  | 6.295 |
| Row 4      | 9 | 0       | 79.085 | 12.180  | 4.060 |
| Row 5      | 9 | 0       | 73.784 | 6.499   | 2.166 |
| Row 6      | 9 | 0       | 77.588 | 21.008  | 7.003 |

| Source of Variation | DF | SS        | MS       | F      | P      |
|---------------------|----|-----------|----------|--------|--------|
| Between Groups      | 5  | 28910.148 | 5782.030 | 32.231 | <0.001 |
| Residual            | 47 | 8431.461  | 179.393  |        |        |
| Total               | 52 | 37341.609 |          |        |        |

The differences in the mean values among the treatment groups are greater than would be expected by chance; there is a statistically significant difference ( $P = <0.001$ ).

Power of performed test with  $\alpha = 0.050$ : 1.000

All Pairwise Multiple Comparison Procedures (Holm-Sidak method):  
Overall significance level = 0.05

Comparisons for factor:

| Comparison      | Diff of Means | t      | P      | P<0.050 |
|-----------------|---------------|--------|--------|---------|
| Row 4 vs. Row 1 | 69.743        | 10.716 | <0.001 | Yes     |
| Row 6 vs. Row 1 | 68.246        | 10.486 | <0.001 | Yes     |
| Row 5 vs. Row 1 | 64.442        | 9.902  | <0.001 | Yes     |
| Row 3 vs. Row 1 | 60.455        | 9.289  | <0.001 | Yes     |
| Row 2 vs. Row 1 | 48.990        | 7.527  | <0.001 | Yes     |
| Row 4 vs. Row 2 | 20.753        | 3.287  | 0.019  | Yes     |
| Row 6 vs. Row 2 | 19.256        | 3.050  | 0.033  | Yes     |
| Row 5 vs. Row 2 | 15.452        | 2.447  | 0.137  | No      |
| Row 3 vs. Row 2 | 11.465        | 1.816  | 0.424  | No      |
| Row 4 vs. Row 3 | 9.289         | 1.471  | 0.617  | No      |
| Row 6 vs. Row 3 | 7.792         | 1.234  | 0.717  | No      |
| Row 4 vs. Row 5 | 5.301         | 0.840  | 0.875  | No      |
| Row 5 vs. Row 3 | 3.988         | 0.632  | 0.897  | No      |
| Row 6 vs. Row 5 | 3.804         | 0.602  | 0.797  | No      |
| Row 4 vs. Row 6 | 1.497         | 0.237  | 0.814  | No      |



## Chemotaxis Figure 9b

### One Way Analysis of Variance

**Normality Test (Shapiro-Wilk)** Failed (P < 0.050)

**Equal Variance Test:** Failed (P < 0.050)

| Group Name | N  | Missing | Mean   | Std Dev | SEM    |
|------------|----|---------|--------|---------|--------|
| con        | 20 | 0       | 7.350  | 5.174   | 1.157  |
| 10nM       | 24 | 0       | 20.000 | 15.668  | 3.198  |
| 50nM       | 22 | 0       | 37.591 | 25.271  | 5.388  |
| 200nM      | 24 | 0       | 85.583 | 52.951  | 10.809 |

| Source of Variation | DF | SS         | MS        | F      | P      |
|---------------------|----|------------|-----------|--------|--------|
| Between Groups      | 3  | 80822.254  | 26940.751 | 27.565 | <0.001 |
| Residual            | 86 | 84053.702  | 977.369   |        |        |
| Total               | 89 | 164875.956 |           |        |        |

The differences in the mean values among the treatment groups are greater than would be expected by chance; there is a statistically significant difference (P = <0.001).

Power of performed test with alpha = 0.050: 1.000

All Pairwise Multiple Comparison Procedures (Holm-Sidak method):  
Overall significance level = 0.05

Comparisons for factor:

| Comparison     | Diff of Means | t     | P      | P<0.050 |
|----------------|---------------|-------|--------|---------|
| 200nM vs. con  | 78.233        | 8.265 | <0.001 | Yes     |
| 200nM vs. 10nM | 65.583        | 7.267 | <0.001 | Yes     |
| 200nM vs. 50nM | 47.992        | 5.201 | <0.001 | Yes     |
| 50nM vs. con   | 30.241        | 3.131 | 0.007  | Yes     |
| 50nM vs. 10nM  | 17.591        | 1.906 | 0.116  | No      |
| 10nM vs. con   | 12.650        | 1.336 | 0.185  | No      |

**Fig 10 Microglia survival – Groups are different 50 to 0 and 200 to 0. 10 to 0 trends to show an increase in the treatment group.**

Normality Test (Shapiro-Wilk) Passed (P = 0.084)

Equal Variance Test: Failed (P < 0.050)

| Group Name | N  | Missing | Mean    | Std Dev | SEM    |
|------------|----|---------|---------|---------|--------|
| 0 nM       | 15 | 0       | 179.733 | 52.009  | 13.429 |
| 10nM       | 14 | 0       | 259.357 | 114.494 | 30.600 |
| 50nM       | 13 | 0       | 316.385 | 138.491 | 38.410 |
| 200nM      | 15 | 0       | 291.667 | 125.355 | 32.366 |

| Source of Variation | DF | SS         | MS        | F     | P     |
|---------------------|----|------------|-----------|-------|-------|
| Between Groups      | 3  | 153018.004 | 51006.001 | 4.106 | 0.011 |
| Residual            | 53 | 658434.558 | 12423.294 |       |       |
| Total               | 56 | 811452.561 |           |       |       |

The differences in the mean values among the treatment groups are greater than would be expected by chance; there is a statistically significant difference (P = 0.011).

Power of performed test with alpha = 0.050: 0.692

Multiple Comparisons versus Control Group (Holm-Sidak method):  
Overall significance level = 0.05

Comparisons for factor:

| Comparison     | Diff of Means | t     | P     | P<0.050 |
|----------------|---------------|-------|-------|---------|
| 0 nM vs. 50nM  | 136.651       | 3.235 | 0.006 | Yes     |
| 0 nM vs. 200nM | 111.933       | 2.750 | 0.016 | Yes     |
| 0 nM vs. 10nM  | 79.624        | 1.922 | 0.060 | No      |
